# Supplementary material
Source: PubMed Central journal article supplement (PMC263771)

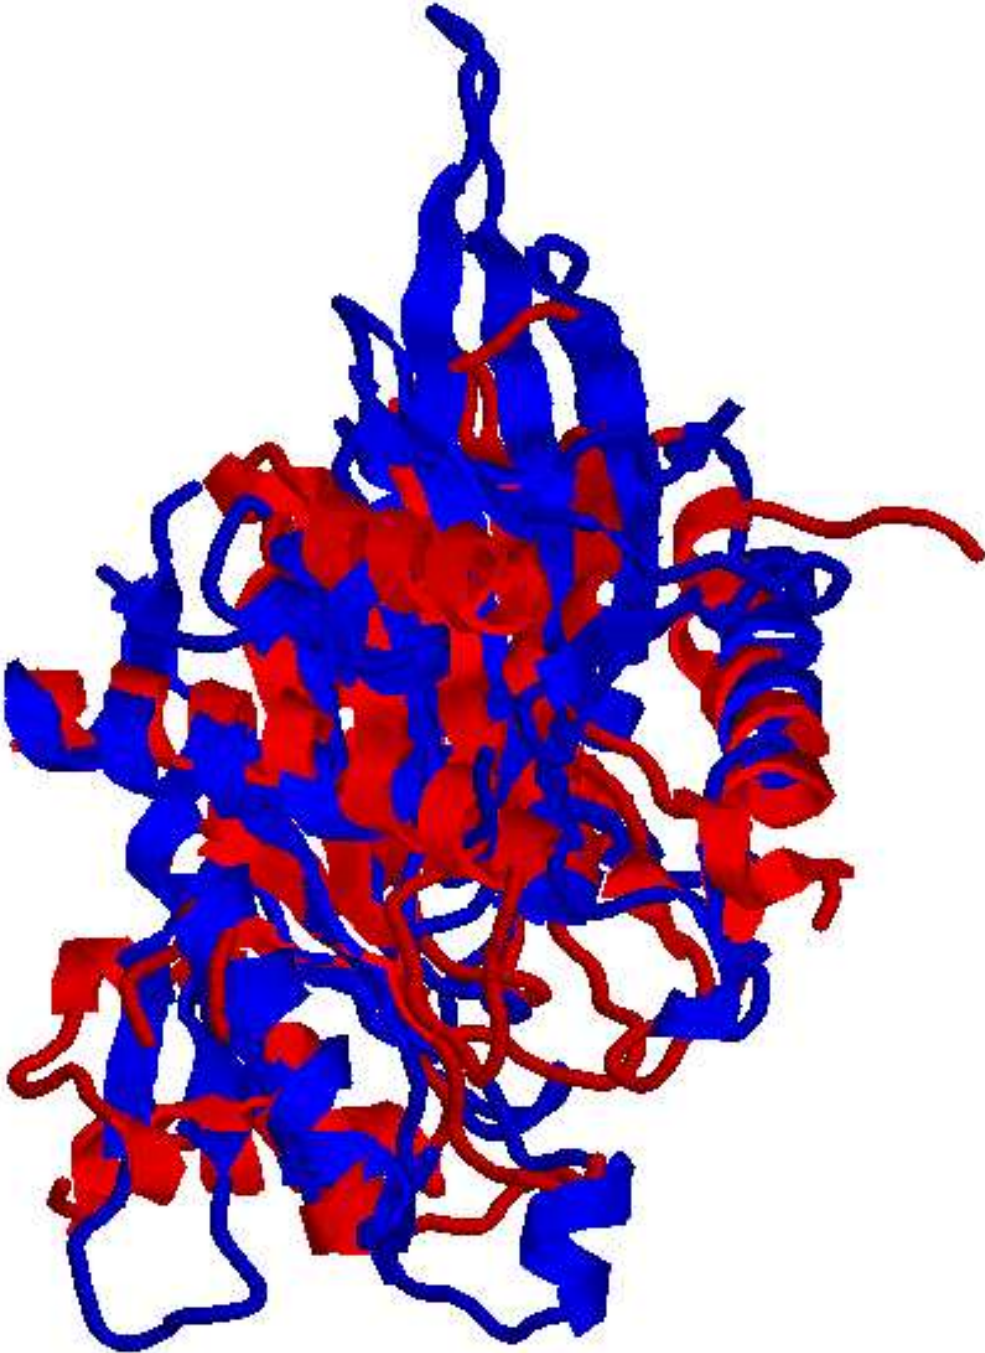

Supplement: pnas_100_23_13253__3.pdf [file pnas_100_23_13253__3.pdf]
